# Supplementary material for: Decorating the surface of Escherichia coli with bacterial lipoproteins: a comparative analysis of different display systems
Source: Microb Cell Fact. 2021 Feb 2;20:33. doi: 10.1186/s12934-021-01528-z (PMC7853708; doi:10.1186/s12934-021-01528-z)
Supplement: Supplementary file 1 — Additional file 1: Table S1. List of primers used in this study. [file 12934_2021_1528_MOESM1_ESM.xlsx]

## Sheet: Sheet1
N°ID	Primer Name	Primer Sequence	Purpose
1	pET15b For	GACTACAAGGACGACGATGACAAGTGATAGCTAGCATAACCCCTTGGGGCC	Amplification of pET15b to insert the delivery system (V-PCR)
2	pET15b Rev	CATGGTATATCTCCTTCTTAAAGTTA	Amplification of pET15b to insert the delivery system (V-PCR)
3	AIDA-I For	AGGAGATATACCATGAACAAAGCCTACAGCATCATTTG	Amplification of AIDA-I construct (I-PCR)
4	AIDA-I Rev	AAGGGGTTATGCTAGTCAAAAGCTATATTTGATACCCAGTG	Amplification of AIDA-I construct (I-PCR)
5	INP For	ATATACCAATGACTCTCGACAAGGCGTTGGTG	Amplification of INP construct (I-PCR)
6	FLAG Rev	CAAGGGGTTATGCTAGCTATCACTTGTCATCGTCGTC	Amplification of Lpp'OmpA/INP construct (I-PCR)
7	Lpp'OmpA For	ATATACCATGAAAGCTACTAAACTGGTACTGGG	Amplification of Lpp'OmpA construct (I-PCR)
8	AIDA-I lipo For	GAGAACCTGTACTTTCAAGGTGGTCGTCGT	Amplification of pET15b::AIDA-I to insert lipoproteins (V-PCR)
9	AIDA-I lipo Rev	TTTATCATCATCATCTTTGTAGTCTTTGTC	Amplification of pET15b::AIDA-I to insert lipoproteins (V-PCR)
10	FLAG For	GACTACAAGGACGACGATGACAA	Amplification of pET15b::Lpp'OmpA or pET15b::InaK to insert lipoproteins (V-PCR)
11	OmpA Rev	ACGGGTAGCGATTTCAGGAGTG	Amplification of pET15b::Lpp'OmpA to insert lipoproteins (V-PCR)
12	C-term INP Rev	CTTTACCTCTATCCAGTCATCGTCCTCGTCGGGTTTAT	Amplification of pET15b::InaK to insert lipoproteins (V-PCR)
13	Full-length CsgGFor	AGGAGATATACCATGAAAACCGTTTCCACCGCCGTTGT	Amplification of full-length lipoprotein to be inserted in pET15b (I-PCR)
14	AIDA-I CsgG For	GATGATGATGATAAAGAATCCTCACGCAGTCTCGAGG	Amplification of mature lipoprotein to be inserted in pET15b::AIDA-I (I-PCR)
15	AIDA-I CsgG Rev	AAAGTACAGGTTCTCACGGTTGGGTTGCCATGCGCC	Amplification of mature lipoprotein to be inserted in pET15b::AIDA-I (I-PCR)
16	Lpp'OmpA CsgG For	GAAATCGCTACCCGTGAATCCTCACGCAGTCTCGAGG	Amplification of mature lipoprotein to be inserted in pET15b::Lpp'OmpA (I-PCR)
17	INP CsgG For	TGGATAGAGGTAAAGGAATCCTCACGCAGTCTCGAGG	Amplification of mature lipoprotein to be inserted in pET15b::InaK (I-PCR)
18	CsgG Flag Rev	GTCGTCCTTGTAGTCACGGTTGGGTTGCCATGCGCC	Amplification of mature lipoprotein to be inserted in pET15b::Lpp'OmpA or pET15b::InaK (I-PCR)
19	Full-length MtrC For	AGGAGATATACCATGGCTTTTTATGCTTTTAAGGCGATGC	Amplification of full-length lipoprotein to be inserted in pET15b (I-PCR)
20	AIDA-I MtrC For	GATGATGATGATAAAAAAGGCGGAGACGCGGCGCA	Amplification of mature lipoprotein to be inserted in pET15b::AIDA-I (I-PCR)
21	AIDA-I MtrC Rev	AAAGTACAGGTTCTCTTCCGCTTCAGAAGCAGTTTTGG	Amplification of mature lipoprotein to be inserted in pET15b::AIDA-I (I-PCR)
22	Lpp'Ompa MtrC For	GAAATCGCTACCCGTAAAGGCGGAGACGCGGCGCA	Amplification of mature lipoprotein to be inserted in pET15b::Lpp'OmpA (I-PCR)
23	INP MtrC For	TGGATAGAGGTAAAGGCGGAGACGCGGCGCA	Amplification of mature lipoprotein to be inserted in pET15b::InaK (I-PCR)
24	MtrC Flag Rev	GTCGTCCTTGTAGTCTTCCGCTTCAGAAGCAGTTTTGG	Amplification of mature lipoprotein to be inserted in pET15b::Lpp'OmpA or pET15b::InaK (I-PCR)
25	Full-length NmBamE For	AGGAGATATACCATGAACAAAACCCTCATACTCGTCCTT	Amplification of full-length lipoprotein to be inserted in pET15b (I-PCR)
26	AIDA-I NmBamE For	GATGATGATGATAAAAGCGTCGAACGCGTTTCACTGTT	Amplification of mature lipoprotein to be inserted in pET15b::AIDA-I (I-PCR)
27	AIDA-I NmBamERev	AAAGTACAGGTTCTCTGGTTTGTCTGTGTTTTGGCGGT	Amplification of mature lipoprotein to be inserted in pET15b::AIDA-I (I-PCR)
28	Lpp'OmpANmBamE For	GAAATCGCTACCCGTAGCGTCGAACGCGTTTCACTGTT	Amplification of mature lipoprotein to be inserted in pET15b::Lpp'OmpA (I-PCR)
29	INP NmBamE For	TGGATAGAGGTAAAGAGCGTCGAACGCGTTTCACTGTT	Amplification of mature lipoprotein to be inserted in pET15b::InaK (I-PCR)
30	NmBamE Flag Rev	GTCGTCCTTGTAGTCTGGTTTGTCTGTGTTTTGGCGGT	Amplification of mature lipoprotein to be inserted in pET15b::Lpp'OmpA or pET15b::InaK (I-PCR)
31	Full-length Putative For	AGGAGATATACCATGATGAATCCGAAAACCTTGAGCCGT	Amplification of full-length lipoprotein to be inserted in pET15b (I-PCR)
32	AIDA-I Putative For	GATGATGATGATAAAAACGGGCAAAAATCCCTGTATTATTA	Amplification of mature lipoprotein to be inserted in pET15b::AIDA-I (I-PCR)
33	AIDA-I Putative Rev	AAAGTACAGGTTCTCTCGCTTGCCTCCTTTACCGGTTT	Amplification of mature lipoprotein to be inserted in pET15b::AIDA-I (I-PCR)
34	Lpp'Ompa Putative For	GAAATCGCTACCCGTAACGGGCAAAAATCCCTGTATTATTA	Amplification of mature lipoprotein to be inserted in pET15b::Lpp'OmpA (I-PCR)
35	INP Putative For	TGGATAGAGGTAAAGAACGGGCAAAAATCCCTGTATTATTA	Amplification of mature lipoprotein to be inserted in pET15b::InaK (I-PCR)
36	Putative Flag Rev	GTCGTCCTTGTAGTCTCGCTTGCCTCCTTTACCGGTTT	Amplification of mature lipoprotein to be inserted in pET15b::Lpp'OmpA or pET15b::InaK (I-PCR)
37	Full-length Pal For	AGGAGATATACCATGCAACTGAACAAAGTGCTGAAAGGG	Amplification of full-length lipoprotein to be inserted in pET15b (I-PCR)
38	AIDA-I Pal For	GATGATGATGATAAAGCATGTTCTTCCAACAAGAACGC	Amplification of mature lipoprotein to be inserted in pET15b::AIDA-I (I-PCR)
39	AIDA-I Pal Rev	AAAGTACAGGTTCTCGTAAACCAGTACCGCACGACGG	Amplification of mature lipoprotein to be inserted in pET15b::AIDA-I (I-PCR)
40	Pal Lpp'OmpA For	GAAATCGCTACCCGT GCATGTTCTTCCAACAAGAACGC	Amplification of mature lipoprotein to be inserted in pET15b::Lpp'OmpA (I-PCR)
41	Pal INP For	TGGATAGAGGTAAAGGCATGTTCTTCCAACAAGAACGC	Amplification of mature lipoprotein to be inserted in pET15b::InaK (I-PCR)
42	Pal FLAG Rev	CTATCACTTGTCATCGTCGTCCTTGTAGTCGTAAACCAGTACCGCACGACGG	Amplification of mature lipoprotein to be inserted in pET15b::Lpp'OmpA or pET15b::InaK (I-PCR)
43	Full-length LolB For	AGGAGATATACCATGCCCCTGCCCGATTTTCGTCTTAT	Amplification of full-length lipoprotein to be inserted in pET15b (I-PCR)
44	AIDA-I LolB For	GATGATGATGATAAAGTTACCACGCCCAAAGGTCCTG	Amplification of mature lipoprotein to be inserted in pET15b::AIDA-I (I-PCR)
45	AIDA-I LolB Rev	AAAGTACAGGTTCTCTTTCACTATCCAGTTATCCATTTTTAAC	Amplification of mature lipoprotein to be inserted in pET15b::AIDA-I (I-PCR)
46	LolB Lpp'OmpA For	TGGATAGAGGTAAAGGTTACCACGCCCAAAGGTCCTG	Amplification of mature lipoprotein to be inserted in pET15b::Lpp'OmpA (I-PCR)
47	LolB INP For	CTATCACTTGTCATCGTCGTCCTTGTAGTCTTTCACTATCCAGTTATCCATT	Amplification of mature lipoprotein to be inserted in pET15b::InaK (I-PCR)
48	LolB Flag Rev	AGGAGATATACCATGCGCTGTAAAACGCTGACTGCTG	Amplification of mature lipoprotein to be inserted in pET15b::Lpp'OmpA or pET15b::InaK (I-PCR)
49	Full-length BamE For	CTATCACTTGTCATCGTCGTCCTTGTAGTCGTTACCACTCAGCGCAGGTTTG	Amplification of full-length lipoprotein to be inserted in pET15b (I-PCR)
50	AIDA-I BamE For	GATGATGATGATAAAGAGCGAGTGGTTTACCGTCCTG	Amplification of mature lipoprotein to be inserted in pET15b::AIDA-I (I-PCR)
51	AIDA-I BamE Rev	AAAGTACAGGTTCTCGTTACCACTCAGCGCAGGTTTGT	Amplification of mature lipoprotein to be inserted in pET15b::AIDA-I (I-PCR)
52	BamE Lpp'OmpA For	AGGAGATATACCATGCGATATCTGGCAACATTGTTGTTAT	Amplification of mature lipoprotein to be inserted in pET15b::Lpp'OmpA (I-PCR)
53	BamE INP For	GAAATCGCTACCCGTGAGCGAGTGGTTTACCGTCCTG	Amplification of mature lipoprotein to be inserted in pET15b::InaK (I-PCR)
54	BamE Flag Rev	CTATCACTTGTCATCGTCGTCCTTGTAGTCGTTACCACTCAGCGCAGGTTTGT	Amplification of mature lipoprotein to be inserted in pET15b::Lpp'OmpA or pET15b::InaK (I-PCR)
55	Full-length LptE For	AGGAGATATACCATGCGATATCTGGCAACATTGTTGTTAT	Amplification of full-length lipoprotein to be inserted in pET15b (I-PCR)
56	AIDA-I LptE For	GATGATGATGATAAACGTGATACCACGCAGGTTCCTT	Amplification of mature lipoprotein to be inserted in pET15b::AIDA-I (I-PCR)
57	AIDA-I LptE Rev	AAAGTACAGGTTCTCGTTACCCAGCGTGGTGGAGAC	Amplification of mature lipoprotein to be inserted in pET15b::AIDA-I (I-PCR)
58	LptE Lpp'OmpA For	GAAATCGCTACCCGTCGTGATACCACGCAGGTTCCTT	Amplification of mature lipoprotein to be inserted in pET15b::Lpp'OmpA (I-PCR)
59	LptE INP For	TGGATAGAGGTAAAGCGTGATACCACGCAGGTTCCTT	Amplification of mature lipoprotein to be inserted in pET15b::InaK (I-PCR)
60	LptE Flag Rev	CTATCACTTGTCATCGTCGTCCTTGTAGTCGTTACCCAGCGTGGTGGAGAC	Amplification of mature lipoprotein to be inserted in pET15b::Lpp'OmpA or pET15b::InaK (I-PCR)
