# Supplementary material for: Decorating the surface of Escherichia coli with bacterial lipoproteins: a comparative analysis of different display systems
Source: Microb Cell Fact. 2021 Feb 2;20:33. doi: 10.1186/s12934-021-01528-z (PMC7853708; doi:10.1186/s12934-021-01528-z)
Supplement: Supplementary file 3 — Additional file 3: Table S2. List of expression plasmids used in this study. [file 12934_2021_1528_MOESM3_ESM.xlsx]

## Sheet: Sheet1
			Plasmid	Characteristics	Reference
			pET15b	Expression vector, AmpR	Novagen
			pET15b::AIDA-I	Expression vector derived from pET15b containing the	In this work
				AIDA-I gene and the tag-FLAG
			pET15b::Lpp'OmpA	Expression vector derived from pET15b containing the	In this work
				Lpp'OmpA chimaerae gene and the tag-FLAG
			pET15b::InaK	Expression vector derived from pET15b containing the	In this work
				INP gene and the tag-FLAG
